## **A role for ATP Citrate Lyase in cell cycle regulation during myeloid differentiation**

Jess Rhee<sup>1,2</sup>, Lauren A. Solomon<sup>1,2</sup>, and Rodney P. DeKoter<sup>1,2</sup>

<sup>1</sup>Department of Microbiology & Immunology and the Centre for Human Immunology, Schulich School of Medicine & Dentistry, Western University, London, Ontario, Canada N6A 5C1.

<sup>2</sup>Division of Genetics and Development, Children's Health Research Institute, Lawson Research Institute, London, Ontario, Canada N6C 2R5.

Correspondence: Rodney P. DeKoter, Department of Microbiology & Immunology, Schulich School of Medicine & Dentistry, Western University, London, Ontario, Canada N6A 5C1. Phone: (519) 661-2084; Fax: (519) 661-3499; E-mail address: [rdekoter@uwo.ca](mailto:rdekoter@uwo.ca)

1 **Abstract**

2           Differentiation of myeloid progenitor cells into macrophages is accompanied by increased  
3 PU.1 concentration and increasing cell cycle length, culminating in cell cycle arrest. Induction of  
4 PU.1 expression in a cultured myeloid cell line expressing low PU.1 concentration results in  
5 decreased levels of mRNA encoding ATP-Citrate Lyase (ACL) and cell cycle arrest. ACL is an  
6 essential enzyme for generating acetyl-CoA, a key metabolite for the first step in fatty acid  
7 synthesis as well as for histone acetylation. We hypothesized that ACL may play a role in cell  
8 cycle regulation in the myeloid lineage. In this study, we found that acetyl-CoA or acetate  
9 supplementation was sufficient to rescue cell cycle progression in cultured BN cells treated with  
10 an ACL inhibitor or induced for PU.1 expression. Acetyl-CoA supplementation was also sufficient  
11 to rescue cell cycle progression in BN cells treated with a fatty acid synthase (FASN) inhibitor.  
12 We demonstrated that acetyl-CoA was utilized in both fatty acid synthesis and histone acetylation  
13 pathways to promote proliferation. Finally, we found that *Acly* mRNA transcript levels decrease  
14 during normal macrophage differentiation from bone marrow precursors. Our results suggest that  
15 regulation of ACL activity is a potentially important point of control for cell cycle regulation in  
16 the myeloid lineage.

## 17 **Introduction**

18           Highly proliferating cells, including cancers, preferentially use glycolysis over oxidative  
19 phosphorylation because, although it is less efficient at generating ATP, glycolysis is rapid and  
20 provides key metabolites for several biosynthetic pathways including nucleotide, amino acid, and  
21 fatty acid synthesis (1). This preferential use of glycolysis by cancer cells is known as the Warburg  
22 effect (1, 2). Glycolysis results in the production of citrate that can be exported from mitochondria  
23 to serve as the substrate for synthesis of acetyl-CoA by the enzyme ATP Citrate Lyase (ACL) (3).  
24 Acetyl-CoA is the required substrate of fatty acid synthase (FASN) in the first step of *de novo* fatty  
25 acid synthesis. Although normal cells and cancer cells can utilize exogenous lipids, FASN-  
26 mediated fatty acid synthesis is required to sustain the needs of highly proliferative cells (4). Many  
27 cancer types display increased endogenous fatty acid biosynthesis, regardless of the levels of  
28 extracellular lipids available (5). Inhibiting FASN is effective in limiting the growth and  
29 proliferation of cancer cells (4, 6).

30           As a central metabolite, there are several anabolic and catabolic pathways that can lead to  
31 the production of acetyl-CoA. These pathways can be located in mitochondria or in the cytoplasm  
32 (7). Within the mitochondria, acetyl-CoA is generated in the matrix by the pyruvate dehydrogenase  
33 complex,  $\beta$ -oxidation of fatty acids, and the catabolic metabolism of branched amino acids (7). In  
34 the cytoplasm, ACL is the central enzyme for production of acetyl-CoA from citrate. Acetyl-CoA  
35 synthetase 2 (ACSS2) can also generate acetyl-CoA from the substrate acetate that can be produced  
36 in the cell or imported into the cell (8).

37           Acetyl-CoA links lipid metabolism and histone acetylation to proliferation by being the  
38 midpoint in these two processes, with ACL produced acetyl-CoA diverted into both the fatty acid  
39 biosynthesis and histone acetylation pathways (9, 10). In addition to lipid biosynthesis, histone  
40 acetylation is also important for proliferation (9, 10). ACL is found in both the nucleus and

41 cytoplasm, and RNA-interference-mediated silencing of ACL significantly reduces global histone  
42 acetylation (9). ACL is known to be upregulated in many cancers, and inhibition of ACL inhibits  
43 cancer cell proliferation (11–15). Therefore, ACL has an essential position in cellular processes,  
44 particularly lipid biosynthesis and histone acetylation, both of which influence cell cycle  
45 progression and proliferation (3, 9, 16).

46 PU.1 is a member of the E26-transformation-specific (ETS)-family of transcription factors  
47 and is essential for myeloid development (17, 18). PU.1 is expressed in hematopoietic stem cells  
48 (HSCs) and is further upregulated during myeloid differentiation (19, 20). Inhibition of PU.1  
49 function in HSCs blocks subsequent myeloid differentiation (19, 21). During macrophage  
50 differentiation, PU.1 protein accumulates, correlating with increasing cell cycle length (22).  
51 Conversely, multiple studies have shown that decreased expression of PU.1 leads to increased cell  
52 cycle progression and eventually acute myeloid leukemia (AML) in mice (23–25). Our laboratory  
53 showed that cell cycle progression is inhibited by induction of PU.1 expression in a cultured  
54 myeloid cell line expressing low PU.1 concentration (*Spi1*<sup>BN/BN</sup>) (25, 26). Induction of PU.1 in  
55 inducible cells (iBN cells) resulted in macrophage differentiation and induction of microRNAs  
56 that targeted acetyl-CoA metabolism including *Acly* encoding ACL (27). We found that chemical  
57 inhibition of ACL activity was sufficient to block cell cycle progression in cultured BN cells (27).

58 The goal of the current study was to explore the mechanism(s) by which cell cycle is  
59 regulated in cultured BN cells through control of ATP Citrate Lyase (ACL) activity. We found  
60 that acetyl-CoA or acetate supplementation was sufficient to rescue cell cycle progression in  
61 cultured BN cells treated with an ACL inhibitor or induced for PU.1 expression. Acetyl-coA  
62 supplementation was also sufficient to rescue cell cycle progression in BN cells treated with a  
63 FASN inhibitor. Through lipid and histone extraction, we demonstrated that acetyl-CoA was  
64 utilized in both fatty acid synthesis and histone acetylation pathways to promote proliferation.

65 However, in ACL inhibited cells, there was an increase in the amount of acetyl-CoA incorporated  
66 into lipids, suggesting that lipid biosynthesis may be a crucial pathway to promote proliferation.  
67 Finally, we found that *Acly* mRNA transcript levels decrease during normal macrophage  
68 differentiation from bone marrow precursors. Our results suggest that regulation of ACL activity  
69 is a potentially important point of control for cell cycle regulation in the myeloid lineage.

## 70 **Methods**

### 71 *Mice*

72 C57BL/6 mice were purchased from Charles River Laboratories (Saint-Constant, QC,  
73 Canada). All experiments were performed on protocols approved by the Western University  
74 Council on Animal Care.

75

### 76 *Cell culture*

77 The BN and iBN inducible cell lines were previously described (25, 27). BN cells were  
78 cultured in Iscove's modified Dulbecco's medium (IMDM) (Wisent, St-Bruno, QC), with 1 ng/ml  
79 GM-CSF (PeproTech, QC), and additionally supplemented with 10% fetal bovine serum (FBS)  
80 (Wisent, St-Bruno, QC), penicillin (100 U/ml)/streptomycin (100 µg/ml) (Mediatech, Manassas,  
81 VA), L-glutamine (2 mmol/L) (Mediatech), 2-mercaptoethanol ( $5 \times 10^{-5}$  M) (Sigma-Aldrich, St.  
82 Louis, MO). PU.1 induction experiments were performed by culture of iBN cells in 1.0 ng/ml GM-  
83 CSF in the presence or absence of 1000 ng/ml doxycycline for 48 hours. Additionally, BN/iBN  
84 cells were cultured in the presence or absence of 100 µM of acetyl-CoA (Sigma Aldrich, Oakville,  
85 ON), 25 mM of acetate (Sigma Aldrich, Oakville, ON), 55µM BMS303141 (Cedar Lane,  
86 Burlington, ON), or 10 µg/ml of C75 (Sigma Aldrich, Oakville, ON). Platinum-E (Plat-E)  
87 retroviral packaging cells were cultured in Dulbecco's modified Eagle's medium (DMEM;  
88 Wisent) supplemented with 10% fetal bovine serum (FBS) (Wisent), penicillin (100  
89 U/ml)/streptomycin (100 µg/ml) (Mediatech), and L-glutamine (2mmol/L) (Mediatech).

90

### 91 *Cell Cycle Analysis*

92 Cell cycle was analyzed by flow cytometry with an allophycocyanin (APC) BrdU Flow Kit  
93 according to the manufacturer's protocol (BD Biosciences, Mississauga, ON). Cells were labeled

94 with bromodeoxyuridine (BrdU) for 2 hours at 37°C. Cells were then incubated with the APC-  
95 conjugated anti-BrdU antibody using a 1:100 dilution. Cells were additionally stained with 7-  
96 amino-actinomycin D (7-AAD; BD Pharmingen) to determine cell cycle position. To stain cells  
97 with 7-AAD, cells were suspended in Dulbecco's phosphate buffered saline (DPBS) supplemented  
98 with 5 mM ethylenediaminetetraacetic acid (EDTA) and 0.5% bovine serum albumin (BSA) and  
99 then incubated with 7-AAD.

100

### 101 *Flow Cytometry*

102 Flow cytometry analysis was performed on single-cell suspensions of cells washed in flow  
103 cytometry buffer consisting of DPBS supplemented with 0.5 mM EDTA and 0.5% BSA.  
104 Antibodies directly conjugated to phycoerythrin (PE) against CD11b and C-kit were utilized to  
105 determine lineage-negative characteristics of extracted bone marrow cells. APC-BrdU was utilized  
106 for cell cycle analysis. Flow cytometric analysis and sorting was performed using a FACSCanto  
107 and FACSARIA III, respectively (BD Immunocytometry Systems, San Jose, CA) at the London  
108 Regional Flow Cytometry Facility. Data was analyzed using FlowJo, version 10 (Tree Star,  
109 Ashland, OR).

110

### 111 *Retrovirus Production*

112 Plat-E retroviral packaging cells (28) were used to generate retroviral supernatants using  
113 PEIPro transfection reagent (Polyplus, Ullkirch, France) at a 3:1 PEIPro/DNA ratio. Supernatant  
114 containing virus was collected 48 hours after transfection. Cells were infected by spinoculation by  
115 centrifugation at 3000 rpm for 3 hours at 32°C with polybrene at a final concentration of 8 µg/ml.  
116 After centrifugation, cells were washed and cultured for 48 hours to allow for retroviral integration

117 and gene expression. Infection frequency was determined by flow cytometric analysis of green  
118 fluorescent protein (GFP).

119

### 120 *Bone Marrow Cell Isolation and Culture*

121 Bone marrow cells were extracted from the femurs and tibias of C57Bl/6 mice. Bone  
122 marrow cells were washed three times with DPBS supplemented with 0.5 mM EDTA and 0.5%  
123 BSA. Bone marrow cells were stained using 1:100 dilutions of biotinylated antibodies recognizing  
124 CD11b, GR1, B220, and TER119 antibodies (BD Pharmingen, Mississauga, ON). The cells were  
125 then labelled with magnetic streptavidin microbeads according to the manufacturer's instructions  
126 (Miltenyi Biotec, Auburn, CA). After washing, cells were lineage depleted using LD columns  
127 (Miltenyi Biotec, Auburn, CA). Unfractionated and lineage-depleted (Lin<sup>-</sup>) cells were labelled  
128 with phycoerythrin (PE) conjugated antibodies for CD11b and c-Kit (BD Biosciences,  
129 Mississauga, ON), and analyzed by flow cytometry. Lin<sup>-</sup> bone marrow cells were grown in culture  
130 with complete IMDM medium supplemented with 10 ng/ml M-CSF (Peprotech, QC).

131

### 132 *Tritium Culture and Scintillation Counting*

133 BN cells were cultured with 0.5  $\mu$ Ci of [<sup>3</sup>H]-acetyl-CoA (Perkin Elmer, Waltham, MA) in  
134 1 mL of complete media for 24 hours. Media was collected in separate tubes and the pellets were  
135 washed three times with PBS. The cell pellets were fully solubilized with 200  $\mu$ l of a 3% solution  
136 of potassium hydroxide (KOH) (29). Solubilized cell pellets were then extracted for their lipid  
137 using 1ml of a 2:1 (v/v) chloroform:methanol solution, similar to the Folch method (without the  
138 neutralization step with acid/chloride salt) (Folch, Lees, & Stanley, 1957). Histones were prepared  
139 directly from cell pellets using a histone extraction kit according to the manufacturer's instructions  
140 (Abcam, Toronto, ON). Disintegrations per minute (DPM) were determined using a LS6500



141 scintillation counter (Beckman Coulter, Ramsey, MN) using 10  $\mu$ l from either solubilized cell  
142 pellets, lipid extracts and histone extracts.

143

#### 144 *Reverse Transcriptase Quantitative PCR*

145 RNA was isolated from cells using TRIzol Reagent (Life Technologies, Carlsbad, CA) and  
146 reverse-transcribed into cDNA using the iScript kit (Bio-Rad, Hercules, CA). Quantitative PCR  
147 (qPCR) was performed using iQ SYBR Green Supermix Kit (Bio-Rad) and a QuantStudio5  
148 instrument (Applied Biosystems, Foster City, CA). Relative messenger RNA (mRNA) levels of  
149 *Acly* were normalized to *B2m* or *Adgre1* as reference genes and compared between samples using  
150 the comparative threshold cycle method (31). Primer sequences are listed in Supplemental Table  
151 1.

152

#### 153 *Statistical Analysis*

154 Statistical significance was determined with ratio-paired *t* test or one-way analysis of  
155 variance (ANOVA) with Tukey's multiple comparison using Prism 5 (GraphPad Software, La  
156 Jolla, CA, USA).

157 **Results**

158 *Supplementation with acetyl-CoA or acetate rescues cell cycle arrest induced by inhibition of ATP*  
159 *Citrate Lyase in cultured myeloid cells*

160 BN cells are myeloid precursor cells that are impaired for differentiation as a consequence  
161 of low PU.1 expression, and proliferate continuously in culture in response to granulocyte-  
162 macrophage colony-stimulating factor (GM-CSF) (26, 32). We previously showed that induction  
163 of PU.1 in inducible BN (iBN) cells resulted in downregulation of *Acly* encoding ATP Citrate  
164 Lyase (ACL), and that this regulation was likely indirectly mediated through induction of  
165 microRNAs (27). BMS303141 (BMS) is an effective inhibitor of ACL activity (33) and was  
166 sufficient to inhibit cell cycle progression in cultured BN cells (27). We set out to determine if  
167 supplementation of BN cells with acetyl-CoA could rescue BMS inhibition of cell cycle. BN cells  
168 were cultured with 55  $\mu$ M BMS, a concentration found to result in half-maximal cell cycle  
169 inhibition as determined by the frequency of cells in S-phase (Fig. 1A, B, and data not shown).  
170 Addition of 100  $\mu$ M acetyl-CoA to BMS-inhibited cultures resulted in a significant increase in the  
171 frequency of S-phase BN cells (Fig. 1C, 1D). The sufficiency of acetyl-CoA to increase cell cycle  
172 progression of BN cells treated with BMS, suggests that this drug inhibits cell cycle progression  
173 by reducing the available cellular pool of acetyl-CoA.

174 Next, acetate was used as a supplement since exogenous sources of acetate are able to be  
175 transported into the cell by monocarboxylate transporters (34). Acetyl-CoA synthetase 2 (ACSS2)  
176 can metabolize acetate into acetyl-CoA (8). Supplementation with 25 mM acetate significantly  
177 rescued proliferation of BN cells treated with 55  $\mu$ M BMS (Fig. 2). This result suggests that BN  
178 cells could convert acetate to acetyl-CoA via the ACSS2 pathway to bypass the block induced by  
179 BMS treatment.

180

181 *Supplementation with acetyl-CoA or acetate rescues cell cycle arrest induced by PU.1 induction*  
182 *in cultured myeloid cells*

183 Our laboratory previously demonstrated that PU.1 induced iBN cells undergo cell cycle  
184 arrest accompanied by downregulation of *Acly* mRNA transcripts (27). Therefore, we wanted to  
185 determine if supplementing PU.1 induced iBN cells with acetyl-CoA or acetate was sufficient to  
186 rescue cell cycle arrest. Following induction of PU.1 in iBN cells with doxycycline, cell cycle  
187 progression was reduced (Fig. 3A, 2B). Supplementation with acetyl-CoA (Fig. 3C, 3D) and to a  
188 lesser extent acetate (Fig. 3E, 3F) significantly rescued PU.1-induced cell cycle arrest. These  
189 results suggest that PU.1 induces cell cycle arrest, at least in part, by down-regulation of production  
190 of acetyl-CoA.

191

192 *Acetyl-CoA rescues cell cycle arrest from impaired FASN function*

193 Given that acetate and acetyl-CoA supplementation were able to rescue cell cycle arrest  
194 from ACL inhibition via BMS and PU.1 induction via doxycycline, we next determined whether  
195 inhibition of fatty acid synthesis could arrest cell cycle in BN cells. C75 is an effective chemical  
196 inhibitor of FASN (35). Culture of BN cells with 10  $\mu\text{g/ml}$  C75 efficiently inhibited cell cycle  
197 progression (Fig. 4A, 5B, 5D). Interestingly, supplementation of C75-treated BN cells with acetyl-  
198 CoA resulted in a significant rescue of cell cycle progression (Fig. 4C, 5D). This result suggests  
199 that inhibition of fatty acid synthesis is sufficient to impair cell cycle progression in cultured BN  
200 cells, and that supplementation with exogenous acetyl-CoA interferes with FASN inhibition by  
201 C75 to rescue fatty acid synthesis and cell cycle progression.

202

203 *Extracellular [ $^3\text{H}$ ]-Acetyl-CoA is incorporated into cells in a regulated manner*

204 It has been shown that acetyl-CoA cannot enter cells by passive diffusion; and there are no  
205 descriptions of transporters that allow for import of extracellular acetyl-CoA (36). Therefore, we  
206 tested the import of extracellular acetyl-CoA into cells by the addition of extracellular [<sup>3</sup>H]-acetyl-  
207 CoA followed by liquid scintillation counting. BN cells were cultured with 0.5 μCi of [<sup>3</sup>H]-acetyl-  
208 CoA for 24 hours. After 24 hours, supernatants were collected and washed cell pellets were fully  
209 solubilized using 3% KOH followed by liquid scintillation counting (29). Solubilized cell pellets  
210 of iBN cells incubated with [<sup>3</sup>H]-acetyl-CoA incorporated a significant amount of <sup>3</sup>H compared to  
211 the negative control (Fig. 5A). As expected, most [<sup>3</sup>H]-acetyl-CoA remained in the supernatant  
212 (Fig. 5A).

213 To determine if uptake of [<sup>3</sup>H]-acetyl-CoA can be actively regulated, we determined if  
214 ACL inhibition affected [<sup>3</sup>H]-acetyl-CoA incorporation. BN cells were cultured in media with 55  
215 μM of BMS to inhibit ACL activity and 0.5 μCi of [<sup>3</sup>H]-acetyl-CoA. Interestingly, culture with  
216 BMS resulted in a significant increase in the incorporation of [<sup>3</sup>H]-acetyl-CoA in BN cells (Fig.  
217 5B). This result suggests that the [<sup>3</sup>H]-acetyl-CoA import mechanism is actively modulated by  
218 intracellular acetyl-CoA concentrations.

219 Next, we set out to determine if supplementation with acetate could affect uptake of [<sup>3</sup>H]-  
220 acetyl-CoA in BN cells. Interestingly, supplementation with 25mM acetate dramatically reduced  
221 the amount of [<sup>3</sup>H]-acetyl-CoA incorporation by BMS-treated BN cells (Fig. 5C). In contrast,  
222 supplementation with 100 μM acetyl-CoA did not significantly reduce the amount of [<sup>3</sup>H]-acetyl-  
223 CoA incorporation by BMS-treated BN cells (Fig. 5C). These results suggest that acetate, but not  
224 exogenous acetyl-CoA, is sufficient to compensate for the need to import additional acetyl-CoA  
225 upon BMS inhibition. Taken together, these results suggest that BN cells actively take up and  
226 incorporate [<sup>3</sup>H]-acetyl-CoA from the exogenous environment of the cells, and that

227 supplementation with acetate results in production of enough acetyl-CoA to prevent detection of  
228 this incorporation from the exogenous environment.

229

230 *[<sup>3</sup>H]-Acetyl-CoA is incorporated into both lipids and histones*

231 Next, we set out to gain insight into the class of mechanism by which acetyl-CoA regulates  
232 cell cycle progression in BN cells. Acetyl-CoA might be able to regulate cell cycle progression by  
233 providing the biological substrates to sustain lipid biosynthesis and proliferation. A second non-  
234 mutually exclusive possibility is that acetyl-CoA concentration is a limiting factor for histone  
235 acetylation to promote gene activation of genes involved in cell cycle regulation (9). To determine  
236 which of these two pathways is involved in acetyl-CoA incorporation, BN cells were incubated  
237 for 24 hours with 0.5  $\mu$ Ci of [<sup>3</sup>H]-acetyl-CoA. Lipids were enriched using the Folch extraction  
238 method (30) and histones were enriched using a histone extraction kit before liquid scintillation  
239 counting. The results showed that [<sup>3</sup>H]-acetyl-CoA was incorporated into both lipids and histones,  
240 although quantitatively more was incorporated into lipids (Fig. 6A). This result suggests that both  
241 pathways may be active in BN cells, although lipid biosynthesis may be quantitatively more  
242 important.

243 In order to confirm and extend the result shown in Fig. 5B that ACL inhibition by BMS  
244 induces increased uptake of [<sup>3</sup>H]-acetyl-CoA, we repeated this experiment and additionally  
245 performed lipid extraction on BN cells treated with or without BMS. The results showed that BMS  
246 treatment increased the amount of [<sup>3</sup>H]-acetyl-CoA incorporation in lipids in BN cells compared  
247 to cells not treated with BMS (Fig. 6C). This result suggests that when acetyl-CoA concentrations  
248 are limiting, cells divert this molecule towards the pathway of lipid biosynthesis. Taken together,  
249 these results are consistent with the idea that ACL inhibition impairs cell cycle/proliferation

250 through decreased lipid biosynthesis, and inhibition can be partially reversed by the exogenous  
251 addition of acetyl-CoA.

252

253 *Decrease in *Acly* mRNA transcript levels during M-CSF-dependent macrophage differentiation*

254 Finally, we wanted to determine whether *Acly* levels decrease during differentiation of  
255 myeloid progenitor cells into macrophages. If decreasing ACL levels are involved with decreasing  
256 cell cycle progression, then we would expect *Acly* mRNA transcript levels to decrease during  
257 macrophage differentiation. To test this idea, bone marrow cells from C57Bl/6 mice were prepared  
258 and lineage depleted ( $\text{Lin}^-$ ) using antibodies for CD11b, GR-1, B220, and TER119 to remove  
259 mature macrophages, granulocytes, B cells, and erythrocytes, respectively (Fig. 7A).  $\text{CD11b}^+$   
260 myeloid cells were efficiently depleted in the  $\text{Lin}^-$  bone marrow cell fraction (Fig. 7B).  $\text{Lin}^-$  cells  
261 were cultured in 10 ng/ml M-CSF for 6 days. Adherent cells were detectable at day 2 and cells  
262 with macrophage morphology were visible by days 4 and 6 (Fig. 7C). RNA was prepared from  
263 adherent cells on days 2, 4, and 6. RT-qPCR analysis was performed to determine the steady-state  
264 mRNA transcript levels for *Acly* relative to either *B2m* (encoding  $\beta 2$  microglobulin) or *Adgre1*  
265 (encoding F4/80) as reference genes. There was a significant decrease in the level of *Acly* mRNA  
266 transcripts with reference to either *B2m* (Fig. 7D) or *Adgre1* (Fig. 7E). This observation suggests  
267 that mRNA transcript levels for *Acly* decrease during macrophage differentiation, consistent with  
268 a potential role in regulation of cell cycle progression in the myeloid lineage.

269 **Discussion**

270 In this study, we showed that acetyl-CoA or acetate supplementation was sufficient to  
271 rescue cell cycle progression in cultured BN cells treated with BMS or induced for PU.1. Acetyl-  
272 CoA supplementation was sufficient to rescue cell cycle progression in cultured BN cells treated  
273 with C75. Through lipid and histone extraction, we were able to demonstrate that acetyl-CoA was  
274 utilized in both fatty acid synthesis and histone acetylation pathways to promote proliferation. In  
275 ACL inhibited cells there was an increase in the amount of acetyl-CoA incorporated into lipids,  
276 suggesting that lipid biosynthesis may be a crucial pathway to promote proliferation. Finally, we  
277 found that *Acly* mRNA transcript levels decrease during normal macrophage differentiation from  
278 bone marrow precursors. Our results suggest that downregulation of ACL activity is a potentially  
279 important point of control for cell cycle regulation in the myeloid lineage.

280 Acetate can be actively transported into cells and metabolized to acetyl-CoA by the enzyme  
281 acyl-CoA synthetase short-chain family member 2 (ACSS2) (8). However, there are no described  
282 mechanisms for active transport of acetyl-CoA (36). Acetyl-CoA transporters have been  
283 discovered in other subcellular compartments, notably acetyl-CoA transporters-1 (AT-1), which is  
284 expressed on the endoplasmic reticulum (ER) and mediated acetyl-CoA transport into the ER  
285 lumen (37–39). In our experiments we found that exogenous supplementation of cell culture media  
286 with acetyl-CoA could rescue cell cycle arrest by chemical inhibition of ACL or FASN.  
287 Furthermore, [<sup>3</sup>H] acetyl-CoA was incorporated into cellular lipids in a manner that was increased  
288 by inhibition of ACL. These results strongly suggest active transport of acetyl-CoA into cultured  
289 BN cells. Given that the AT-1 transporter is found to be localized on the ER, we speculate that  
290 AT-1 could be exported to the Golgi apparatus, and from the Golgi to the cell membrane (40). A  
291 second possibility is that acetyl-CoA enters BN cells through active phagocytosis or pinocytosis.

292 BN cells express PU.1, although at low concentration, and the pattern of gene expression in these  
293 cells suggests that they are immature myelomonocytic cells that are capable of phagocytosis (25).  
294 An important question is whether either lipid biosynthesis or histone acetylation is the “sensor” to  
295 signal for cell cycle regulation by ACL inhibition. BMS treated iBN cells had higher [<sup>3</sup>H]-acetyl-  
296 CoA incorporation in their lipids than histones, suggesting that lipid biosynthesis may be the  
297 preferential pathway by which extracellular acetyl-CoA rescues iBN cells from cell cycle arrest.  
298 Consistent with lipid synthesis being the predominant mechanism by which ACL inhibition blocks  
299 cell cycle progression, one study utilized shRNA to silence *Acly* expression and showed reduced  
300 proliferation in these *Acly* silenced cells when grown in reduced lipid conditions (14). This study  
301 showed that supplementation with fatty acid, oleic acid, and acetate was sufficient to rescue cell  
302 cycle (14). Therefore, taken together, these results suggest that acetyl-CoA as a supplement is able  
303 to restore cell cycle progression in BMS treated BN cells by restoring the acetyl-CoA available in  
304 these cells for lipid biosynthesis to allow for cell cycle progression.

305 Previous studies suggested a link between PU.1 concentration and regulation of cell cycle  
306 progression. Small reductions in PU.1 concentration lead to increased proliferation and reduced  
307 differentiation of hematopoietic stem cells and myeloid progenitor cells (24, 26, 41). Re-  
308 introduction of PU.1 into proliferating cells expressing low PU.1 concentration rapidly induces  
309 cell cycle arrest and differentiation (23, 25). Induction of cell cycle arrest by PU.1 is accompanied  
310 by reduced *Acly* mRNA transcript levels (27). We showed in the current study that *Acly* mRNA  
311 transcript levels also decreased during normal M-CSF-dependent macrophage differentiation (Fig.  
312 8). Therefore, we speculate that macrophage differentiation from myeloid progenitors involves  
313 several feedback loops involving PU.1 and *Acly*. Reduced *Acly* mRNA and ACL protein levels  
314 would lead to increased cell cycle length due to reduced lipid biosynthesis. Increased cell cycle  
315 length promotes PU.1 protein accumulation (22). High PU.1 concentration would then promote



316 macrophage differentiation as marked by increased expression by genes such as *Adgre1* and  
317 expression of microRNAs targeting *Acly* (27). This would feed back to further decrease ACL levels  
318 to promote cell cycle arrest and macrophage differentiation.

319           In conclusion, it is well documented that nutrient depletion impairs cell cycle progression  
320 in normal or cancerous cells. However, there is still little known about the sensor(s) that transmit  
321 information about nutrient status to the cell cycle clock (42, 43). Our results suggest that regulation  
322 of the acetyl-CoA pool in cells may be an important mechanism to control cell cycle in developing  
323 myeloid cells. The size of the acetyl-CoA pool can be sensed by multiple mechanisms including  
324 through the rate of lipid biosynthesis or by histone acetylation (44). An important future direction  
325 will be to further explore the pathway by which the size of the intracellular pool of acetyl-CoA  
326 regulates the cell cycle clock in myeloid cells.

327 **Acknowledgements**

328           We thank Kristin Chadwick and the London Regional Flow Cytometry Core Facility for  
329 assistance with flow cytometric analysis. We thank Drs. Murray Huff and Bryan Heit (Western  
330 University) for helpful advice and discussion. This work was supported by a Canada Graduate  
331 Scholarship-Masters to J.R. and by a Natural Sciences and Engineering Research Council  
332 Discovery Grant to R.D. (Grant 04749-2010).

### 333 **References**

- 334 1. Lunt, S. Y., and M. G. Vander Heiden. 2011. Aerobic Glycolysis: Meeting the Metabolic  
335 Requirements of Cell Proliferation. *Annu. Rev. Cell Dev. Biol.* 27: 441–464.
- 336 2. Warburg, B. Y. O. 1956. On the origin of cancer cells. *Science (80-. )*. 123: 309–314.
- 337 3. Shi, L., and B. P. Tu. 2015. Acetyl-CoA and the regulation of metabolism: Mechanisms and  
338 consequences. *Curr. Opin. Cell Biol.* 33: 125–131.
- 339 4. Rohrig, F., and A. Schulze. 2016. The multifaceted roles of fatty acid synthesis in cancer. *Nat.*  
340 *Rev. Cancer* 16: 732–749.
- 341 5. Menendez, J. A., and R. Lupu. 2007. Fatty acid synthase and the lipogenic phenotype in  
342 cancer pathogenesis. *Nat. Rev. Cancer* 7: 763–777.
- 343 6. Flavin, R., S. Peluso, P. Nguyen, and M. Loda. 2010. Fatty acid synthase as a potential  
344 therapeutic target in cancer. *Futur. Oncol.* 6: 551–562.
- 345 7. Pietrocola, F., L. Galluzzi, J. M. Bravo-San Pedro, F. Madeo, and G. Kroemer. 2015. Acetyl  
346 coenzyme A: A central metabolite and second messenger. *Cell Metab.* 21: 805–821.
- 347 8. Schug, Z. T., J. Vande Voorde, and E. Gottlieb. 2016. The metabolic fate of acetate in cancer.  
348 *Nat. Rev. Cancer* 16: 708–717.
- 349 9. Wellen, K. E., G. Hatzivassiliou, U. M. Sachdeva, T. V Bui, J. R. Cross, and C. B. Thompson.  
350 2009. ATP-citrate lyase links cellular metabolism to histone acetylation. *Science (80-. )*. 324:  
351 1076–1080.
- 352 10. Cai, L., B. M. Sutter, B. Li, and B. P. Tu. 2011. Acetyl-CoA induces cell growth and  
353 proliferation by promoting the acetylation of histones at growth genes. *Mol Cell* 42: 426–437.
- 354 11. Hatzivassiliou, G., F. Zhao, D. E. Bauer, C. Andreadis, A. N. Shaw, D. Dhanak, S. R.  
355 Hingorani, D. A. Tuveson, and C. B. Thompson. 2005. ATP citrate lyase inhibition can suppress  
356 tumor cell growth. *Cancer Cell* 8: 311–321.

- 357 12. Bauer, D. E., G. Hatzivassiliou, F. Zhao, C. Andreadis, and C. B. Thompson. 2005. ATP  
358 citrate lyase is an important component of cell growth and transformation. *Oncogene* 24: 6314–  
359 6322.
- 360 13. Wang, D., L. Yin, J. Wei, Z. Yang, and G. Jiang. 2017. ATP citrate lyase is increased in  
361 human breast cancer, depletion of which promotes apoptosis. *Tumor Biol.* 39:  
362 101042831769833.
- 363 14. Zaidi, N., I. Royaux, J. V. Swinnen, and K. Smans. 2012. ATP Citrate Lyase Knockdown  
364 Induces Growth Arrest and Apoptosis through Different Cell- and Environment-Dependent  
365 Mechanisms. *Mol. Cancer Ther.* 11: 1925–1935.
- 366 15. Khwairakpam, A. D., M. S. Shyamananda, B. L. Sailo, S. R. Rathnakaram, G. Padmavathi, J.  
367 Kotoky, and A. B. Kunnumakkara. 2015. ATP citrate lyase (ACLY): a promising target for  
368 cancer prevention and treatment. *Curr. Drug Targets* 16: 156–63.
- 369 16. Cai, L., and B. P. Tu. 2011. On acetyl-CoA as a gauge of cellular metabolic state. *Cold*  
370 *Spring Harb. Symp. Quant. Biol.* 76: 195–202.
- 371 17. Scott, E. W., M. C. Simon, J. Anastasi, and H. Singh. 1994. Requirement of transcription  
372 factor PU.1 in the development of multiple hematopoietic lineages. *Science* (80-. ). 265: 1573–  
373 1577.
- 374 18. Turkistany, S. A., and R. P. Dekoter. 2011. The transcription factor PU.1 is a critical  
375 regulator of cellular communication in the immune system. *Arch. Immunol. Ther. Exp. (Warsz).*  
376 59.
- 377 19. Voso, M. T., T. C. Burn, G. Wulf, B. Lim, G. Leone, and D. G. Tenen. 1994. Inhibition of  
378 hematopoiesis by competitive binding of transcription factor PU.1. *Proc. Natl. Acad. Sci. U. S.*  
379 *A.* 91: 7932–6.
- 380 20. Nutt, S. L., D. Metcalf, A. D’Amico, M. Polli, and L. Wu. 2005. Dynamic regulation of PU.1

- 381 expression in multipotent hematopoietic progenitors. *J Exp Med* 201: 221–231.
- 382 21. Cheng, T., H. Shen, D. Giokas, J. Gere, D. G. Tenen, and D. T. Scadden. 1996. Temporal  
383 mapping of gene expression levels during the differentiation of individual primary hematopoietic  
384 cells. *Proc. Natl. Acad. Sci. U. S. A.* 93: 13158–63.
- 385 22. Kueh, H. Y., A. Champhekar, S. L. Nutt, M. B. Elowitz, and E. V Rothenberg. 2013. Positive  
386 feedback between PU.1 and the cell cycle controls myeloid differentiation. *Science (80-. ).* 341:  
387 670–673.
- 388 23. Rosenbauer, F., K. Wagner, J. L. Kutok, H. Iwasaki, M. M. Le Beau, Y. Okuno, K. Akashi,  
389 S. Fiering, and D. G. Tenen. 2004. Acute myeloid leukemia induced by graded reduction of a  
390 lineage-specific transcription factor, PU.1. *Nat Genet* 36: 624–630.
- 391 24. Will, B., T. O. Vogler, S. Narayanagari, B. Bartholdy, T. I. Todorova, M. da Silva Ferreira, J.  
392 Chen, Y. Yu, J. Mayer, L. Barreyro, L. Carvajal, D. B. Neriah, M. Roth, J. van Oers, S.  
393 Schatzlein, C. McMahon, W. Edelmann, A. Verma, and U. Steidl. 2015. Minimal PU.1  
394 reduction induces a preleukemic state and promotes development of acute myeloid leukemia. *Nat*  
395 *Med* 21: 1172–1181.
- 396 25. Ziliotto, R., M. R. Gruca, S. Podder, G. Noel, C. K. Ogle, D. A. Hess, and R. P. DeKoter.  
397 2014. PU.1 promotes cell cycle exit in the murine myeloid lineage associated with  
398 downregulation of E2F1. *Exp Hematol* 42: 204–217 e1.
- 399 26. Houston, I. B., M. B. Kamath, B. L. Schweitzer, T. M. Chlon, and R. P. DeKoter. 2007.  
400 Reduction in PU.1 activity results in a block to B-cell development, abnormal myeloid  
401 proliferation, and neonatal lethality. *Exp Hematol* 35: 1056–1068.
- 402 27. Solomon, L. A., S. Podder, J. He, N. L. Jackson-Chornenki, K. Gibson, R. G. Ziliotto, J.  
403 Rhee, and R. P. DeKoter. 2017. Coordination of myeloid differentiation with reduced cell cycle  
404 progression by PU.1 Induction of microRNAs targeting cell cycle regulators and lipid anabolism.

- 405 *Mol. Cell. Biol.* 37.
- 406 28. Morita, S., T. Kojima, and T. Kitamura. 2000. Plat-E: an efficient and stable system for  
407 transient packaging of retroviruses. *Gene Ther* 7: 1063–1066.
- 408 29. Puchalski, R. F., and D. K. Jasper. 1985. Sodium hypochlorite as a tissue solubilizing agent  
409 compatible with liquid scintillation counting. *Int. J. Appl. Radiat. Isot.* 36: 543–546.
- 410 30. Folch, J., M. Lees, and G. Sloane Stanley. 1957. A simple method for the isolation and  
411 purification of total lipides from animal tissues. *J. Biol. Chem.* 226: 497–509.
- 412 31. Livak, K. J., and T. D. Schmittgen. 2001. Analysis of relative gene expression data using  
413 real-time quantitative PCR and the 2(-Delta Delta C(T)) Method. *Methods* 25: 402–408.
- 414 32. Kamath, M. B., I. B. Houston, A. J. Janovski, X. Zhu, S. Gowrisankar, A. G. Jegga, and R. P.  
415 DeKoter. 2008. Dose-dependent repression of T-cell and natural killer cell genes by PU.1  
416 enforces myeloid and B-cell identity. *Leukemia* 22: 1214–1225.
- 417 33. Li, J. J., H. Wang, J. A. Tino, J. A. Robl, T. F. Herpin, R. M. Lawrence, S. Biller, H. Jamil,  
418 R. Ponticello, L. Chen, C. H. Chu, N. Flynn, D. Cheng, R. Zhao, B. Chen, D. Schnur, M. T.  
419 Obermeier, V. Sasseville, R. Padmanabha, K. Pike, and T. Harrity. 2007. 2-hydroxy-N-  
420 arylbenzenesulfonamides as ATP-citrate lyase inhibitors. *Bioorg Med Chem Lett* 17: 3208–3211.
- 421 34. Comerford, S. A., Z. Huang, X. Du, Y. Wang, L. Cai, A. K. Witkiewicz, H. Walters, M. N.  
422 Tantawy, A. Fu, H. C. Manning, J. D. Horton, R. E. Hammer, S. L. Mcknight, and B. P. Tu.  
423 2014. Acetate dependence of tumors. *Cell* 159: 1591–1602.
- 424 35. Kuhajda, F. P., E. S. Pizer, J. N. Li, N. S. Mani, G. L. Frehywot, and C. A. Townsend. 2000.  
425 Synthesis and antitumor activity of an inhibitor of fatty acid synthase. *Proc. Natl. Acad. Sci.* 97:  
426 3450 LP-3454.
- 427 36. Bhagavan, N. V., and C.-E. Ha. 2011. Lipids I. In *Essentials of Medical Biochemistry*  
428 Elsevier. 191–207.

- 429 37. Kanamori, A., J. Nakayama, M. N. Fukuda, W. B. Stallcup, K. Sasaki, M. Fukuda, and Y.  
430 Hirabayashi. 1997. Expression cloning and characterization of a cDNA encoding a novel  
431 membrane protein required for the formation of O-acetylated ganglioside: a putative acetyl-CoA  
432 transporter. *Proc. Natl. Acad. Sci. U. S. A.* 94: 2897–902.
- 433 38. Hirabayashi, Y., A. Kanamori, K. H. Nomura, and K. Nomura. 2004. The acetyl-CoA  
434 transporter family SLC33. *Mol. Aspects Med.* 34: 586–589.
- 435 39. Jonas, M. C., M. Pehar, and L. Puglielli. 2010. AT-1 is the ER membrane acetyl-CoA  
436 transporter and is essential for cell viability. *J. Cell Sci.* 123: 3378–88.
- 437 40. Borgese, N. 2016. Getting membrane proteins on and off the shuttle bus between the  
438 endoplasmic reticulum and the Golgi complex. *J. Cell Sci.* 129: 1537–1545.
- 439 41. Staber, P. B., P. Zhang, M. Ye, R. S. Welner, C. Nombela-Arrieta, C. Bach, M. Kerenyi, B.  
440 A. Bartholdy, H. Zhang, M. Alberich-Jorda, S. Lee, H. Yang, F. Ng, J. Zhang, M. Leddin, L. E.  
441 Silberstein, G. Hoefler, S. H. Orkin, B. Gottgens, F. Rosenbauer, G. Huang, and D. G. Tenen.  
442 2013. Sustained PU.1 levels balance cell-cycle regulators to prevent exhaustion of adult  
443 hematopoietic stem cells. *Mol Cell* 49: 934–946.
- 444 42. Aguilar, V., and L. Fajas. 2010. Cycling through metabolism. *EMBO Mol Med* 2: 338–348.
- 445 43. Lee, I. H., and T. Finkel. 2013. Metabolic regulation of the cell cycle. *Curr Opin Cell Biol*  
446 25: 724–729.
- 447 44. Sivanand, S., I. Viney, and K. E. Wellen. 2018. Spatiotemporal Control of Acetyl-CoA  
448 Metabolism in Chromatin Regulation. *Trends Biochem. Sci.* 43: 61–74.
- 449

450 **Figure Legends**

451

452 **Figure 1. Regulation of cell cycle progression in cultured BN cells by ACL inhibition and**  
453 **acetyl-CoA supplementation. A)** Representative cell cycle analysis of BN cells 48 hr after start  
454 of culture. **B)** Cell cycle analysis of BN cells cultured with 55 $\mu$ M BMS for 48 hr. **C)** Cell cycle  
455 analysis of BN cells cultured with 55 $\mu$ M BMS and 100  $\mu$ M acetyl-CoA for 48 hr. **D)** Quantitation  
456 of the frequency of cells in S-phase for four experiments as shown in representative panels B and  
457 C. Statistical analysis was performed by paired *t*-test (\*  $p < 0.05$ ).

458

459 **Figure 2. Regulation of cell cycle progression in cultured BN cells by ACL inhibition and**  
460 **acetate supplementation. A)** Representative cell cycle analysis of BN cells 48 hr after start of  
461 culture. **B)** Cell cycle analysis of BN cells cultured with 55 $\mu$ M BMS for 48 hr. **C)** Cell cycle  
462 analysis of BN cells cultured with 55 $\mu$ M BMS and 25 mM acetate for 48 hr. **D)** Quantitation of  
463 the frequency of cells in S-phase for four experiments as shown in representative panels B and C.  
464 Statistical analysis was performed by paired *t*-test (\*\*  $p < 0.01$ ).

465

466 **Figure 3. Regulation of cell cycle progression in cultured iBN cells by PU.1 induction and**  
467 **acetyl-CoA supplementation. A)** Representative cell cycle analysis of iBN cells 48 hr after start  
468 of culture. **B)** Cell cycle analysis of iBN cells cultured with 1000ng/ml doxycycline for 48 hr. **C)**  
469 Cell cycle analysis of BN cells cultured with 1000ng/ml doxycycline and 100  $\mu$ M acetyl-CoA for  
470 48 hr. **D)** Quantitation of the frequency of cells in S-phase for four experiments as shown in  
471 representative panels B and C. Statistical analysis was performed by paired *t*-test (\*  $p < 0.05$ ). **E)**  
472 Cell cycle analysis of BN cells cultured with 1000ng/ml doxycycline and 25 mM acetate for 48 hr.



473 **F)** Quantitation of the frequency of cells in S-phase for four experiments as shown in representative  
474 panels B and E. Statistical analysis was performed by paired *t*-test (\*  $p < 0.05$ ).

475

476

477 **Figure 4. Regulation of cell cycle progression in cultured BN cells by FAS inhibition and**  
478 **acetyl-CoA supplementation. A)** Representative cell cycle analysis of BN cells 48 hr after start  
479 of culture. **B)** Cell cycle analysis of BN cells cultured with 10  $\mu\text{g/ml}$  C75 for 48 hr. **C)** Cell cycle  
480 analysis of BN cells cultured with 10  $\mu\text{g/ml}$  C75 and 100  $\mu\text{M}$  acetyl-CoA for 48 hr. **D)** Quantitation  
481 of the frequency of cells in S-phase for four experiments as shown in representative panels B and  
482 C. Statistical analysis was performed by paired *t*-test (\*  $p < 0.05$ ).

483

484 **Figure 5. Regulated incorporation of [<sup>3</sup>H]-acetyl-CoA into cultured BN cells. A)** Incorporation  
485 of [<sup>3</sup>H]-acetyl-CoA into cultured BN cells. BN cells were incubated for 24 hr with 0.5  $\mu\text{Ci}$  [<sup>3</sup>H]-  
486 acetyl-CoA. DPM were determined in the supernatant and solubilized cell pellets. Statistics were  
487 determined using one-way ANOVA with Tukey's multiple comparisons test,  $p < 0.05$  (n=6). **B)**  
488 Increased incorporation of [<sup>3</sup>H]-acetyl-CoA into cultured BN cells upon ACL inhibition. BN cells  
489 were treated with (right bar) or without (middle bar) 55  $\mu\text{M}$  BMS and incubated for 24 hr with 0.5  
490  $\mu\text{Ci}$  [<sup>3</sup>H]-acetyl-CoA. DPM were determined in solubilized cell pellets. Data is presented as mean  
491  $\pm$  SEM, one-way ANOVA with Tukey's multiple comparisons test,  $p < 0.05$ , n=7. **C)** Decreased  
492 incorporation of [<sup>3</sup>H]-acetyl-CoA into cultured BN cells upon BMS and acetate but not BMS and  
493 Acetyl-CoA supplementation. BN cells were supplemented with either 25 mM acetate (third bar)  
494 or 100  $\mu\text{M}$  acetyl-CoA (fourth bar) at the same time as 55  $\mu\text{M}$  BMS and incubated for 24 hr with  
495 0.5  $\mu\text{Ci}$  [<sup>3</sup>H]-acetyl-CoA. DPM were determined in solubilized cell pellets. Data are presented as

496 mean  $\pm$  SEM. Statistics were determined using one-way ANOVA with Tukey's multiple  
497 comparisons test, \*  $p < 0.05$  (n=5 experiments).

498

499 **Figure 6 [<sup>3</sup>H]-acetyl-CoA is incorporated in both lipids and histones. A)** BN cells were  
500 incubated with [<sup>3</sup>H]-acetyl-CoA for 24 hours followed by enrichment of lipids or histones as  
501 described in Materials & Methods. Normalized DPM was determined using liquid scintillation  
502 counting and correction for volume. Data are presented as mean  $\pm$  SEM, one-way ANOVA with  
503 Tukey's multiple comparisons test,  $p < 0.05$ , n=5. **B)** Increased incorporation of [<sup>3</sup>H]-acetyl-CoA  
504 into lipids upon ACL inhibition. BN cells were treated with (right bar) or without (middle bar) 55  
505  $\mu$ M BMS and incubated for 24 hr with 0.5  $\mu$ Ci [<sup>3</sup>H]-acetyl-CoA. DPM were determined in lipid  
506 extracts. Data are presented as mean  $\pm$  SEM, one-way ANOVA with Tukey's multiple  
507 comparisons test, \*  $p < 0.05$ , \*\*  $p < 0.01$ , n=5 experiments.

508

509 **Figure 7. Decreased *Acly* mRNA transcript levels during macrophage differentiation. A)**  
510 Schematic for enrichment of Lineage negative (Lin<sup>-</sup>) myeloid progenitor cells from bone marrow  
511 using magnetic bead depletion. **B)** Depletion of CD11b<sup>+</sup> cells from bone marrow. Left panel shows  
512 frequency of CD11b<sup>+</sup> cells in unfractionated bone marrow. Right panel shows frequency of  
513 CD11b<sup>+</sup> cells in Lin<sup>-</sup> bone marrow. **C)** Generation of macrophages by culture in complete media  
514 containing 10 ng/ml M-CSF. Representative photomicrographs were taken at 2 (left panel), 4  
515 (middle panel), and 6 (right panel) days. Scale bar indicates 20  $\mu$ m. **D, E)** *Acly* mRNA transcript  
516 levels decrease during macrophage differentiation. Using RT-qPCR, mRNA levels of *Acly* in the  
517 column separated BMCs were determined for day 2, 4, and 6 time points. *Acly* transcript levels  
518 were normalized to  $\beta 2m$  (D) or *Adgre1* (E). Statistical analysis was performed using two-way  
519 ANOVA, \*  $p < 0.05$ , n=3 experiments.

**Figure 1**

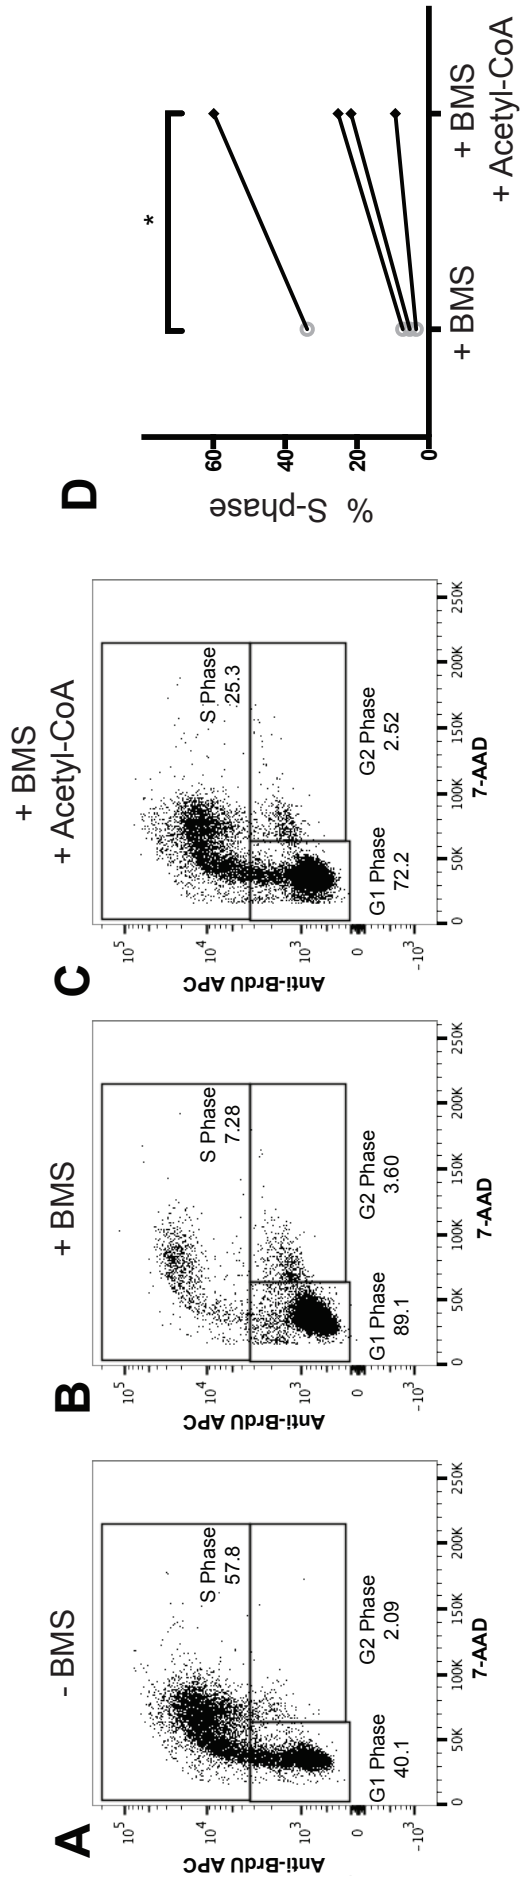

**Figure 2**

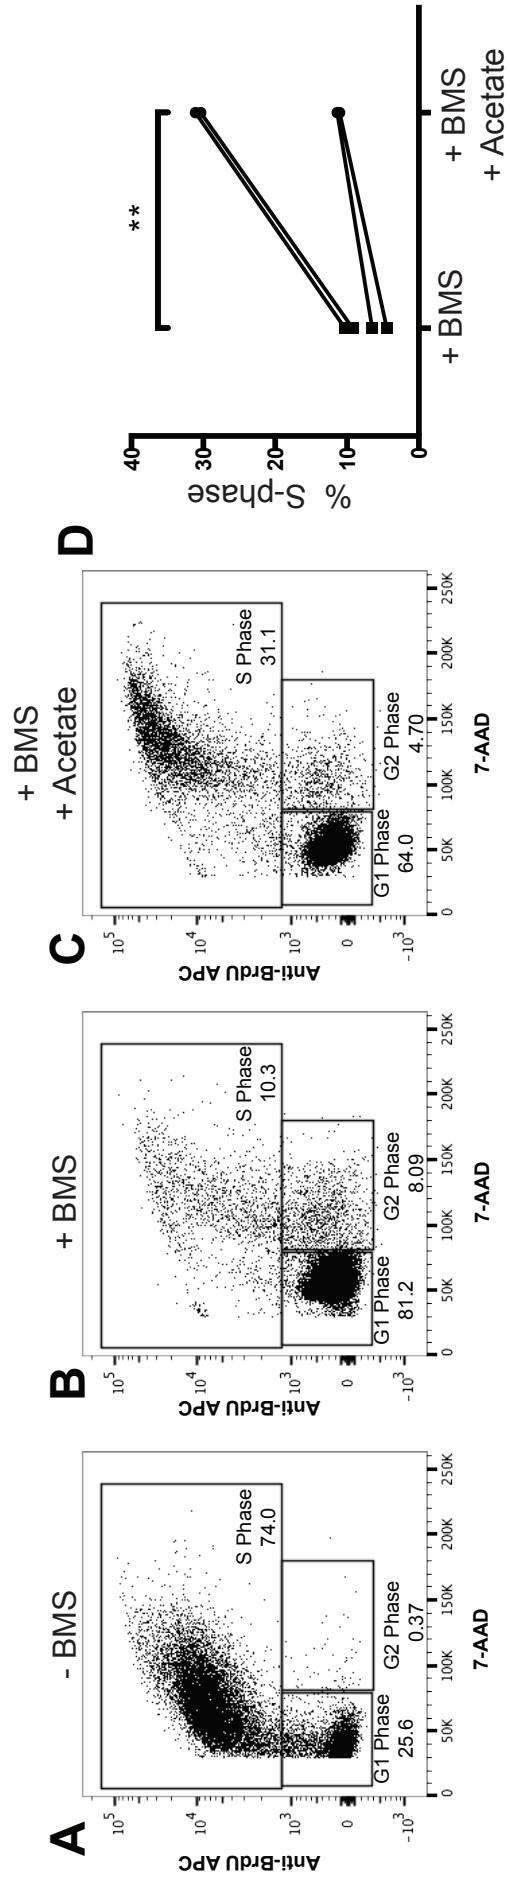

### Figure 3

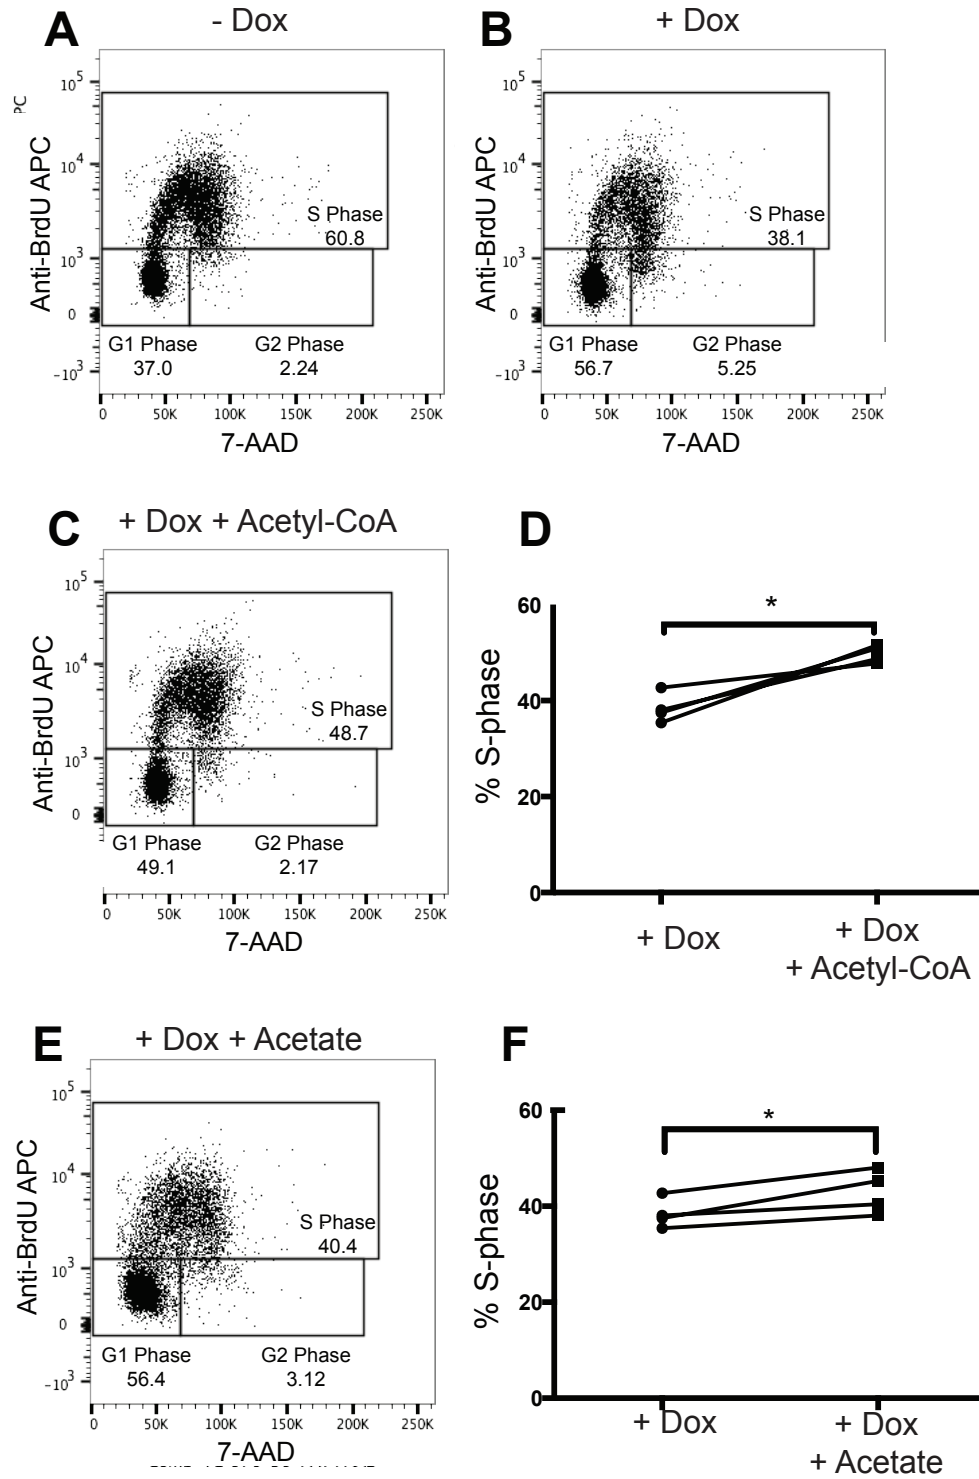

**Figure 4**

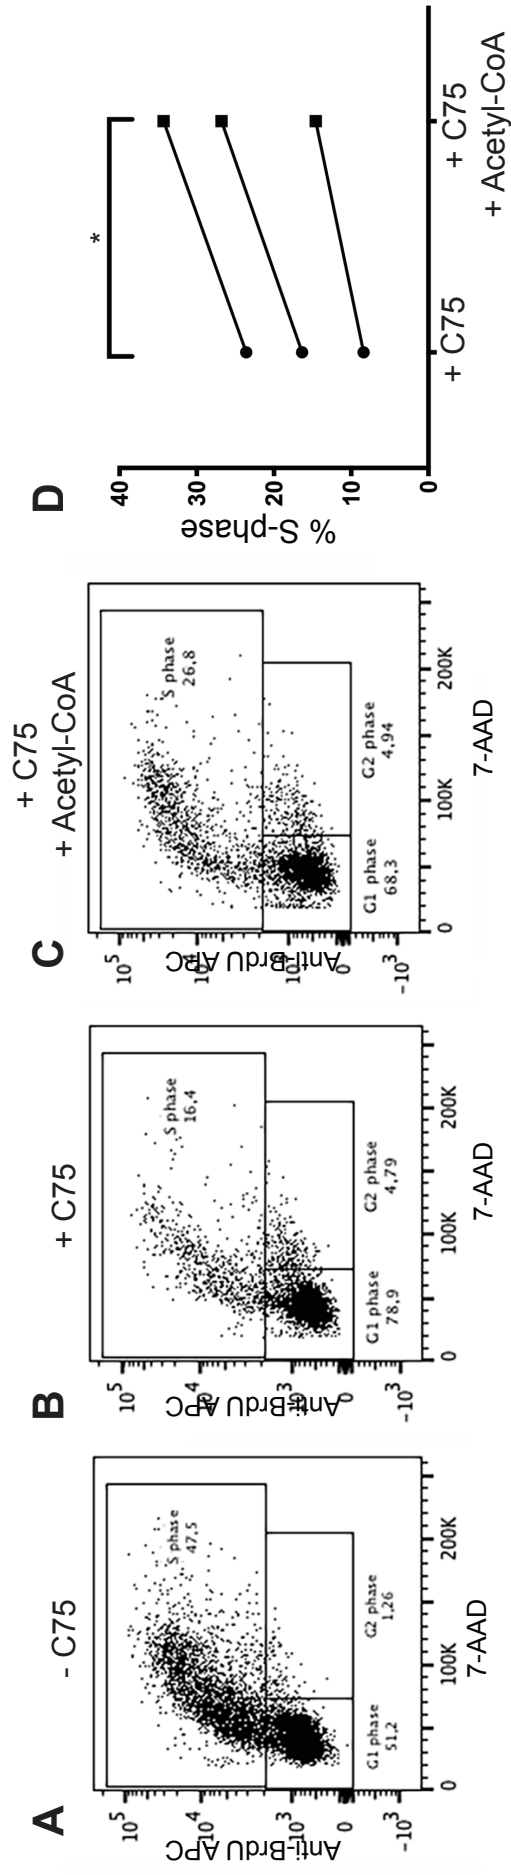

## Figure 5

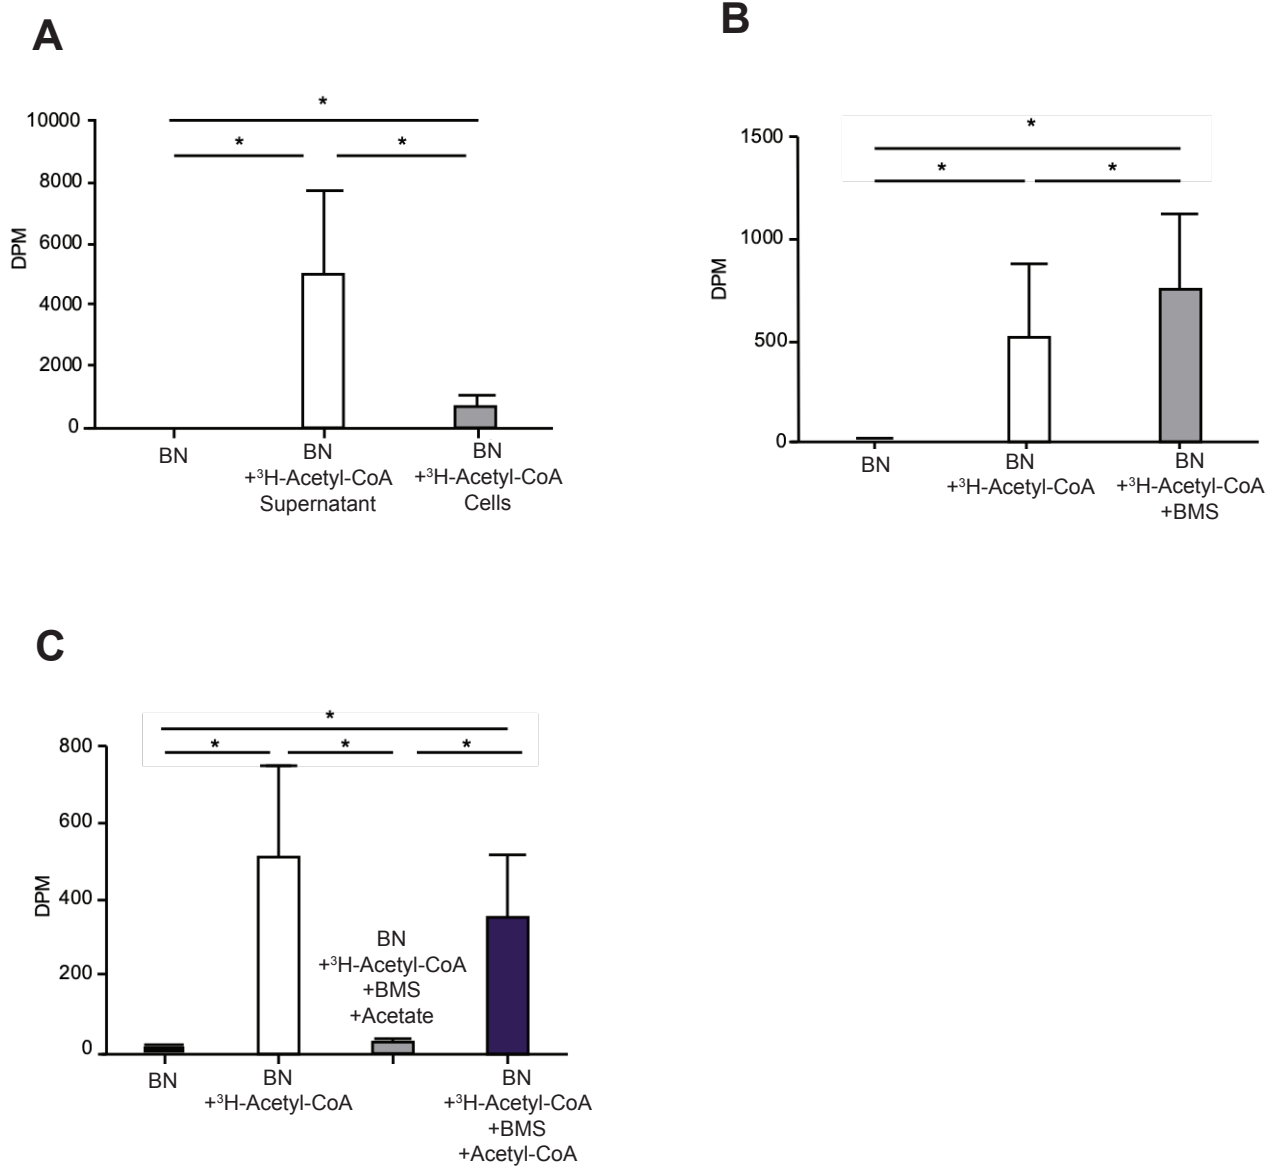

## Figure 6

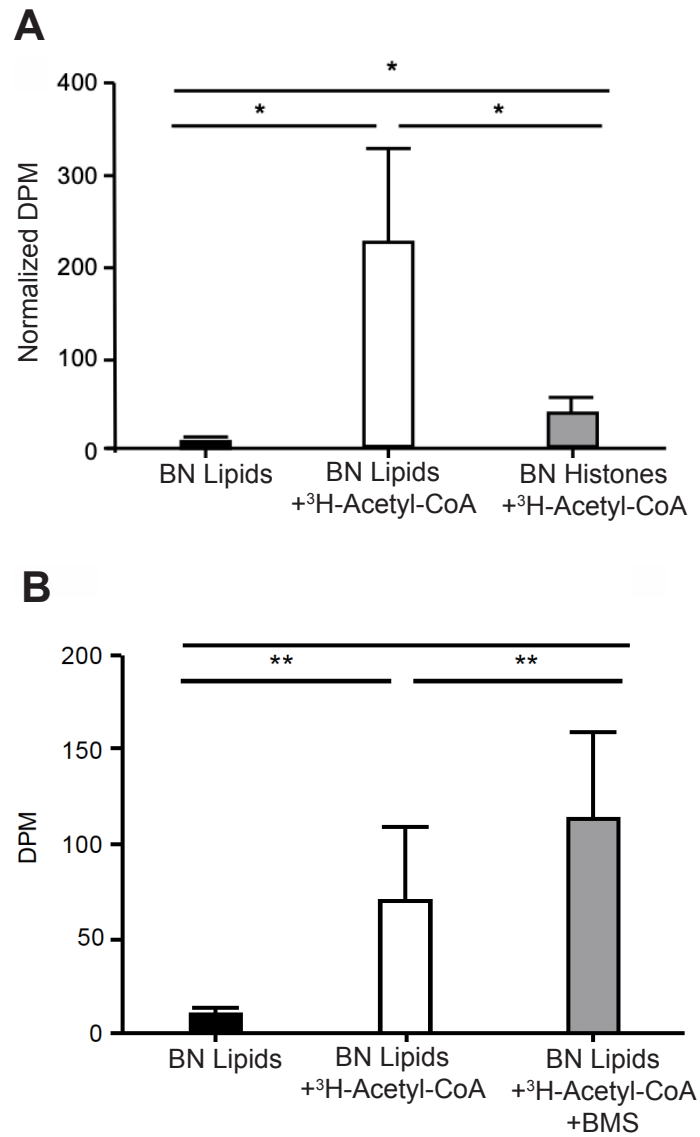



**Figure 7**

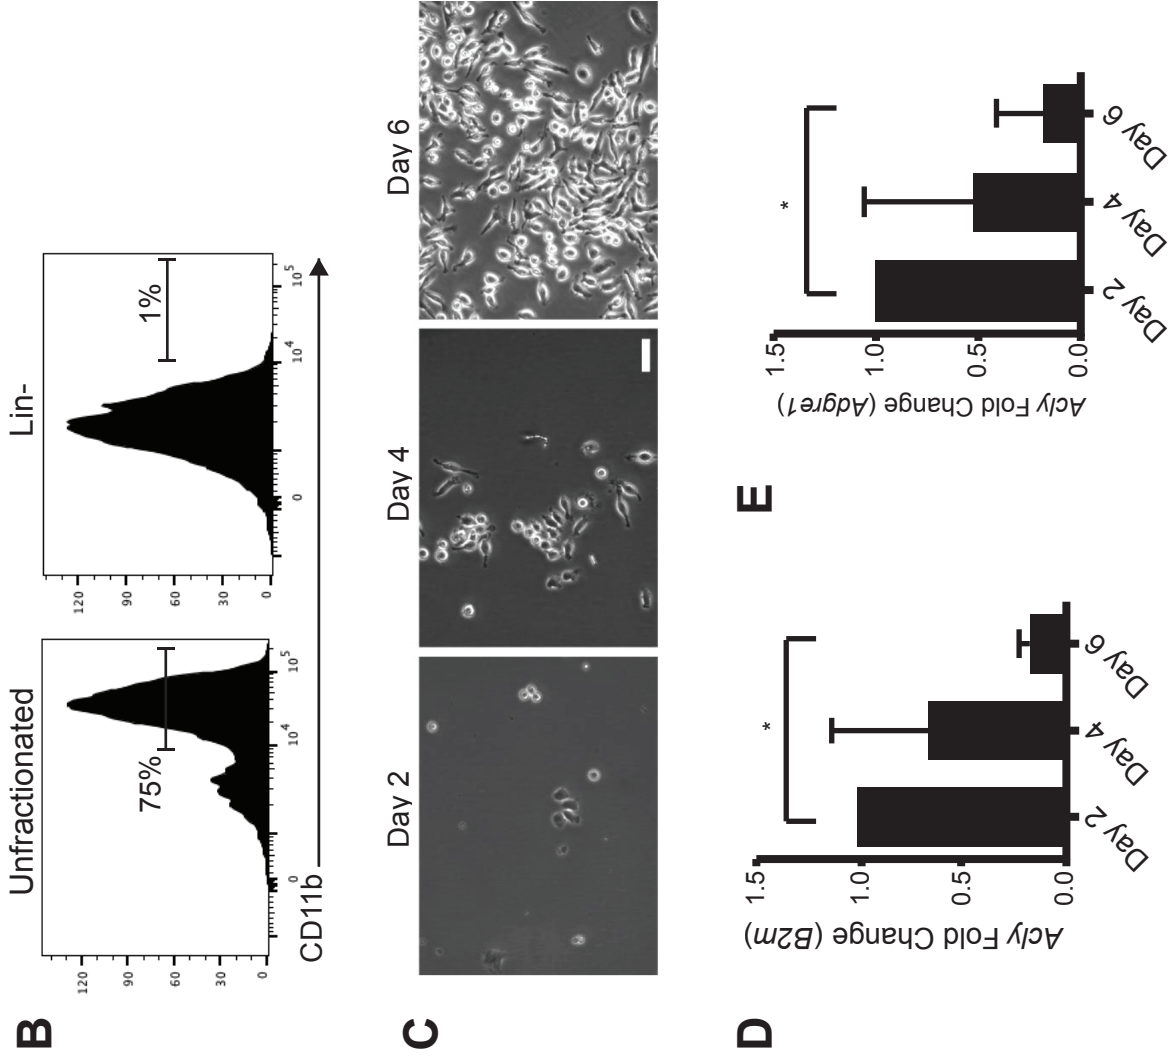

### Supplemental Table 1 – Primer sequences

| Primer Name           | Sequence                        |
|-----------------------|---------------------------------|
| <i>Acly</i> forward   | 5'-CCAGTGAACAACAGACCTATGA- '    |
| <i>Acly</i> reverse   | 5'-AATGCTGCCTCCAATGATG- '       |
| <i>B2m</i> forward    | 5'-TGGCTCACACTGAATTCACCCCCA-3'  |
| <i>B2m</i> reverse    | 5'-TCTCGATCCCAGTAGACGGTCTTGG-3' |
| <i>Adgre1</i> forward | 5'-GTGGTCATAATCTCTGCTTCTGT-3'   |
| <i>Adgre1</i> reverse | 5'-AAACTCCAGATAAACCCCGTC-3'     |
